# Supplementary material for: Chemical and structural characterization of SeIV biotransformations by Stenotrophomonas bentonitica into Se0 nanostructures and volatiles Se species
Source: Royal Society of Chemistry journal article supplement (doi:10.1039/d0en00507j), 2020-01-01
Supplement: d0en00507j5.pdf [file d0en00507j5.pdf]

| Wavenumber (cm <sup>-1</sup> ) | Functional group assignment                                                                                                              |
|--------------------------------|------------------------------------------------------------------------------------------------------------------------------------------|
| 3289                           | N-H stretching in Amides (Amide A) of proteins.                                                                                          |
| 2960                           | C-H antisymmetric stretching vibrations in -CH <sub>3</sub> characteristics of fatty acid chains of membranes and amino acid side-chain. |
| 2927                           | C-H antisymmetric stretching vibrations in -CH <sub>2</sub> characteristics of fatty acid chains of membranes and amino acid side-chain. |
| 2874                           | C-H symmetric stretching vibrations in -CH <sub>3</sub>                                                                                  |
| 2855                           | C-H symmetric stretching vibrations in -CH <sub>2</sub> in fatty acids                                                                   |
| 1657                           | Stretching C=O in amides (amide I band) of proteins                                                                                      |
| 1537                           | N-H bending and C-N stretching in amides (amide II band) of proteins. Asymmetric stretching for deprotonated COO <sup>-</sup> groups     |
| 1401                           | C=O symmetric stretching vibrations of COO <sup>-</sup> functional groups of amino acid side chains or free fatty acids.                 |
| 1235                           | Vibrations of C-O in carboxylic groups. Double bond stretching of >P=O of general phosphoryl groups and phosphodiester of nucleic acids. |
| 1062                           | P=O symmetric stretching in nucleic acids. Stretching vibrations of C-OH, C-O-C and C-C of polysaccharides.                              |
