# Supplementary material for: Chemical and structural characterization of SeIV biotransformations by Stenotrophomonas bentonitica into Se0 nanostructures and volatiles Se species
Source: Royal Society of Chemistry journal article supplement (doi:10.1039/d0en00507j), 2020-01-01
Supplement: d0en00507j7.pdf [file d0en00507j7.pdf]

| Binding Energy (eV) |                      |            | Scan         |                      |            | Assignment       |
|---------------------|----------------------|------------|--------------|----------------------|------------|------------------|
| Peaked peaks        | Cal associated peaks | Cal fitsum | Peaked peaks | Cal associated peaks | Cal fitsum |                  |
|                     |                      |            |              |                      |            |                  |
| <b>C 1s</b>         |                      |            |              |                      |            |                  |
| 284.9               | 285                  | 285        | 282          | 282                  | 46.3       | C-C, C-H         |
| 286.6               | 286.4                | 286.3      | 282          | 282                  | 32         | C-O, C-N         |
| 288.4               | 288                  | 287.8      | 284          | 284                  | 14.3       | C=O              |
| 289.1               | 289                  | 289.1      | 28           | 4.8                  | 1.8        | O-C-O            |
| <b>O 1s</b>         |                      |            |              |                      |            |                  |
| 533.6               | 533.4                | 533.7      | 533          | 60.1                 | 63.4       | C=O              |
| 533.2               | 533.1                | 533.1      | 533          | 26.9                 | 23.4       | C=O              |
| <b>N 1s</b>         |                      |            |              |                      |            |                  |
| 400.2               | 400.1                | 400.1      | 404          | 6.1                  | 33.8       | Amine            |
| 402.1               | 401.8                | 401.4      | 38.1         | 8                    | 36.4       | Protonated amine |
| <b>Sr 3d</b>        |                      |            |              |                      |            |                  |
| 21.2                | 21.7                 | N/A        | 28.8         | 48.2                 | N/A        | SR2              |
| 24.2                | 23.2                 | N/A        | 28.8         | 17.2                 | N/A        | SR2              |
| 34.1                | 34.6                 | N/A        | 21.2         | 28.7                 | N/A        | SR2              |
| 37.1                | 38.2                 | N/A        | 21.1         | 12.8                 | N/A        | SR2              |
