# Supplementary figures and images for: Chemical and structural characterization of SeIV biotransformations by Stenotrophomonas bentonitica into Se0 nanostructures and volatiles Se species
Source: Royal Society of Chemistry journal article supplement (doi:10.1039/d0en00507j), 2020-01-01

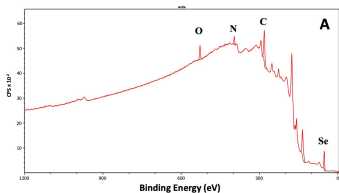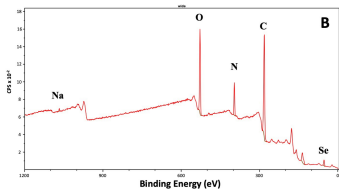

Supplement: d0en00507j2.pdf [file d0en00507j2.pdf]

**Purified SeNPs**

**Cell associated SeNPs**

**Cell biomass**

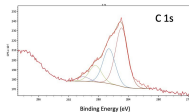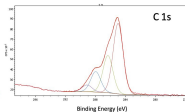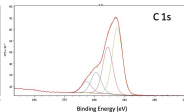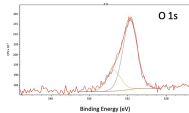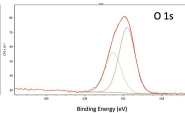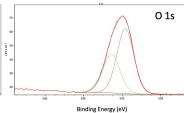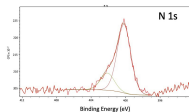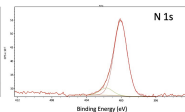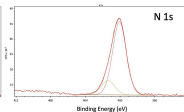

Supplement: d0en00507j3.pdf [file d0en00507j3.pdf]
